# Supplementary material
Source: publisher figshare collection journal article supplement (https://gsajournals.figshare.com/articles/dataset/_/18130898)
Supplement: Supplementary file 1 [file 1]

1                                   Supplementary Materials for:  
2       **Ongoing transposition in cell culture reveals the**  
3       **phylogeny of diverse *Drosophila* S2 sub-lines.**

4       Shunhua Han\*, Guilherme Dias<sup>†,\*</sup>, Preston J. Basting\*, Michael G. Nelson<sup>‡</sup>,  
5                                   Sanjai Patel<sup>‡</sup>, Mar Marzo<sup>‡</sup>, and Casey M. Bergman<sup>\*,†</sup>

6       \*Institute of Bioinformatics, University of Georgia, Athens, GA, USA, 30602

7       <sup>†</sup>Department of Genetics, University of Georgia, Athens, GA, USA, 30602

8       <sup>‡</sup>Faculty of Life Sciences, University of Manchester, Manchester, United  
9                                   Kingdom, M13 9PT

10   **Address for correspondence:**

11   Casey M. Bergman

12   Department of Genetics and Institute of Bioinformatics

13   University of Georgia

14   Davison Life Sciences Building

15   120 E. Green St.

16   Athens, GA 30601

17   cbergman@uga.edu

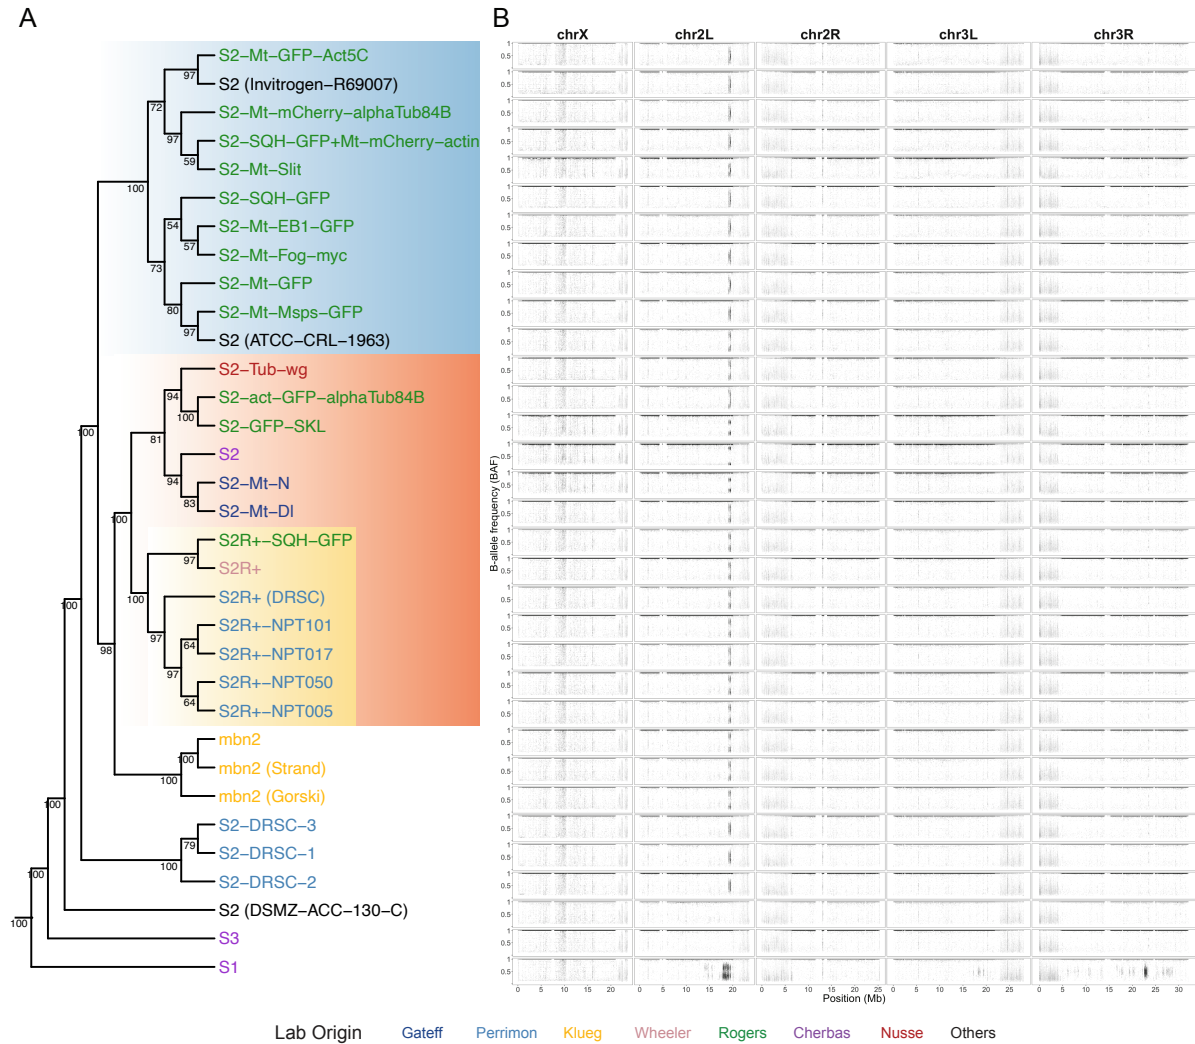

**Figure S1. Genome-wide profiles of intra-sample allele frequency based on SNP variants for Schneider cell lines samples.** B-allele frequency (BAF) was determined as the coverage of reads supporting the non-reference allele divided by total coverage at that variant positions. The majority of SNPs detected in these samples are homozygous (BAF  $\sim 1.0$ ). A small patch of heterozygosity at the base of chromosome arm 2L is found in all S2 sub-lines with the exception of the most basal sample S2 (DSMZ-ACC-130-C), which supports the monophyly of the S2 clade based on TE insertions.

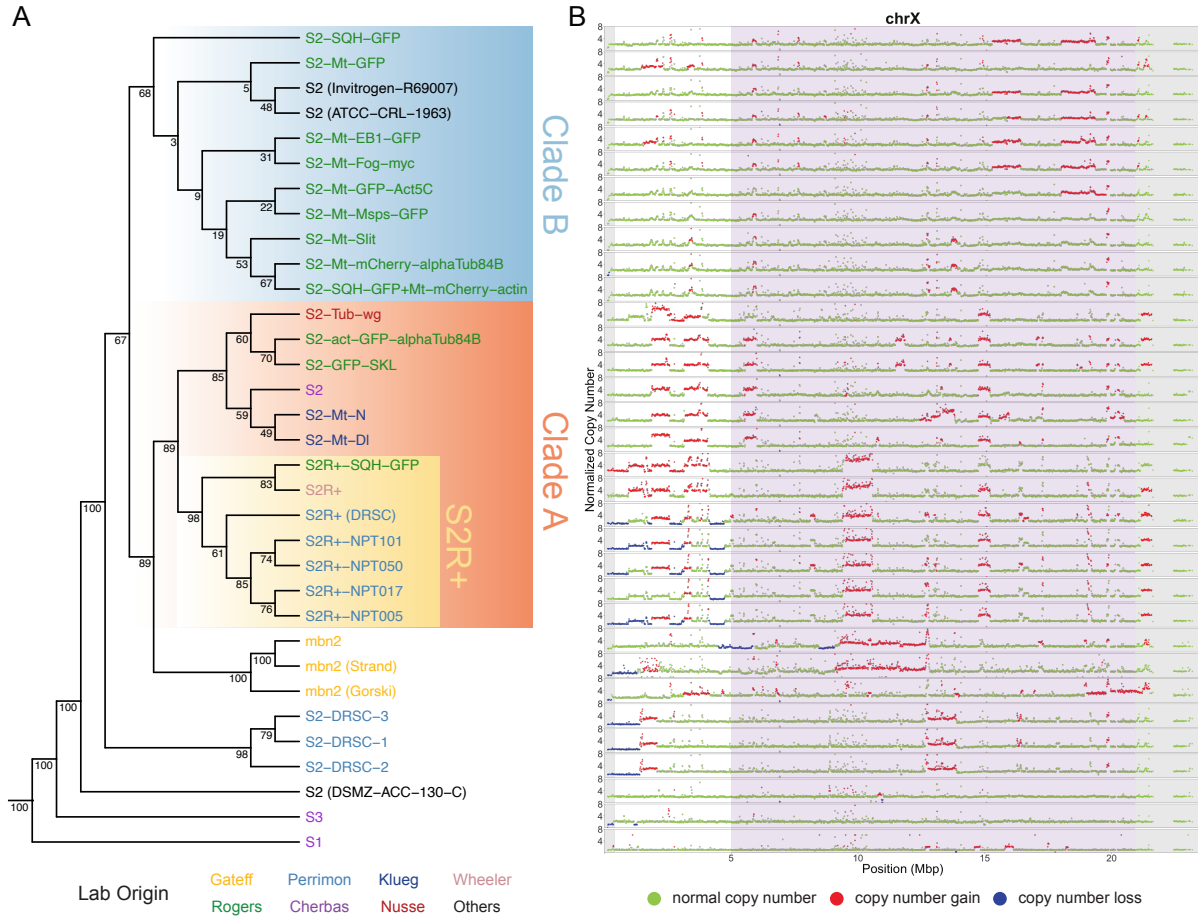

**Figure S2. Evolutionary relationship among S2 sub-lines inferred using TE profiles in regions without major shared copy number losses.** (A) Dollo parsimony tree including a panel of 26 *Drosophila* S2 sub-lines constructed using non-reference TE insertions predicted by TEMP (Zhuang *et al.*, 2014) in regions of chromosome X without major shared copy number losses (chrX:500000-20928973) indicated by purple shading. Samples from S1, S3, and mbn2 cell lines and replicate samples for S2-DRSC were also included. Percent bootstrap support was annotated below each node. *Drosophila* Genomics Resource Center (DGRC) cell line names are used as taxa labels. Samples obtained from other sources are labeled in the format of “cell line name (source name)”. Taxa labels were colorized based on donor labs in which cell sub-lines were developed. (B) Copy number profiles of chromosome X for samples included in panel A. Each data point represents normalized copy number (ratio\*ploidy) for a given 10 kb window estimated by Control-FREEC (Boeva *et al.*, 2012). Data points for each window are colorized by CNV status (red: CNV gain; green: no CNV; blue: CNV loss), which are based on the comparison between normalized copy number estimated by Control-FREEC and baseline ploidy estimated by Lee *et al.* (2014). Regions without major shared copy number losses among S2 sub-lines are shaded in purple. Low recombination regions are shaded in grey.

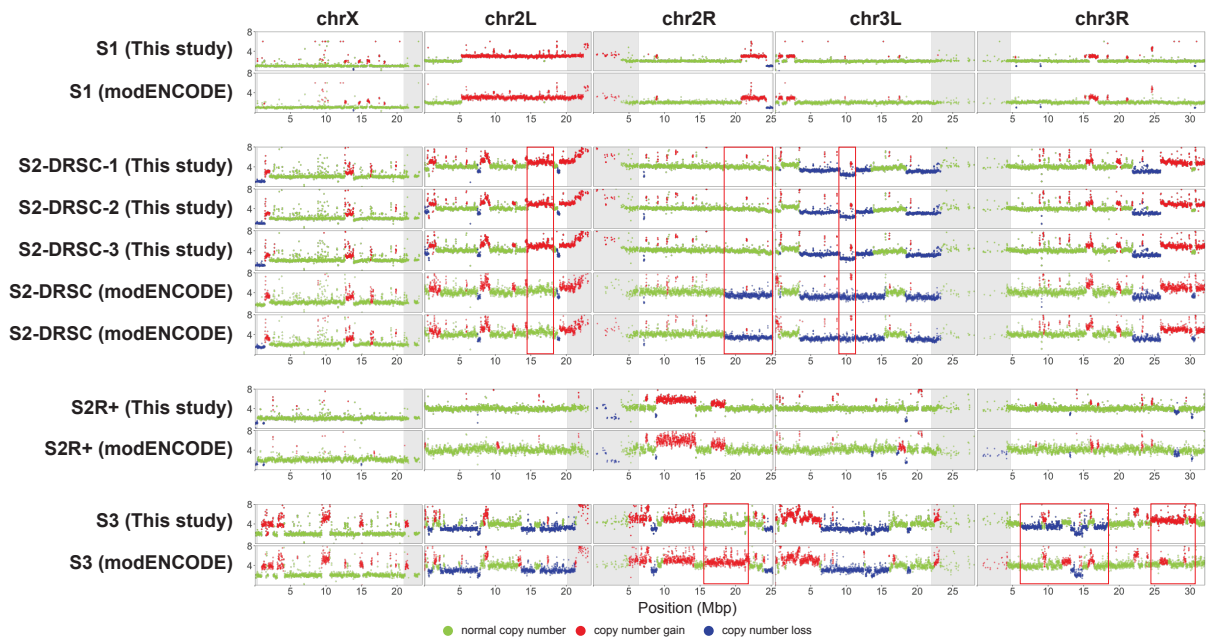

**Figure S3. Copy number profiles of four Schneider cell sub-line samples using data collected from this study and the modENCODE project.** Each data point represents normalized copy number (ratio\*ploidy) for a given 10 kb window estimated by Control-FREEC (Boeva *et al.*, 2012). Data points for each window are colorized by CNV status (red: CNV gain; green: no CNV; blue: CNV loss), which are based on the comparison between normalized copy number estimated by Control-FREEC and baseline ploidy estimated by Lee *et al.* (2014). For each cell line sample, regions that exhibit differences in major CNV patterns between this study and the modENCODE project are marked in red boxes. Low recombination regions are shaded in grey.



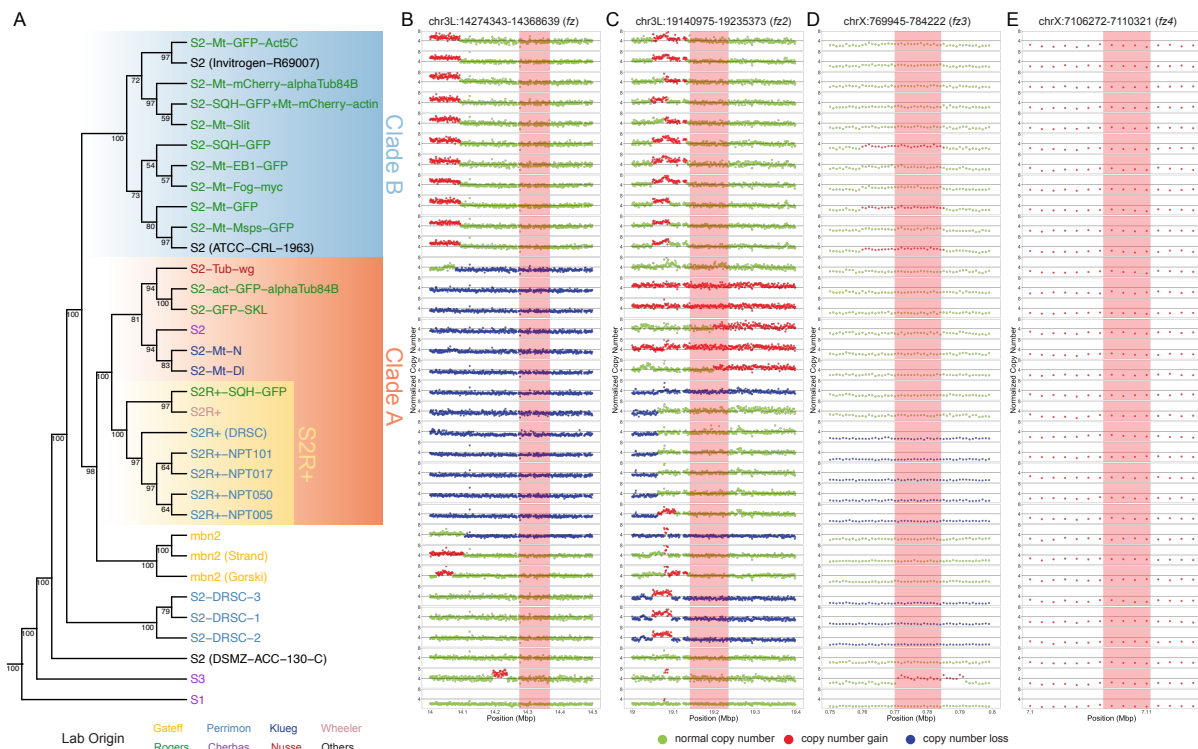

**Figure S4. Copy number profiles of four *frizzled* genes for Schneider cell sub-line samples.** (A) Dollo parsimony tree including a panel of 26 *Drosophila* S2 sub-lines constructed using non-reference TE predictions made by TEMP (Zhuang *et al.*, 2014). Samples from S1, S3, and mbn2 cell lines and replicate samples for S2-DRSC were also included. Percent bootstrap support was annotated below each node. *Drosophila* Genomics Resource Center (DGRC) cell line names are used as taxa labels. Samples obtained from other sources are labeled in the format of “cell line name (source name)”. Taxa labels were colorized based on donor labs in which cell sub-lines were developed. (B-E) Copy number profiles of *fz*, *fz2*, *fz3*, and *fz4* gene loci for samples included in panel A. Each data point represents normalized copy number (ratio\*ploidy) for a given 1 kb window estimated by Control-FREEC (Boeva *et al.*, 2012). Data points for each window are colorized by CNV status (red: CNV gain; green: no CNV; blue: CNV loss), which are based on the comparison between normalized copy number estimated by Control-FREEC and baseline ploidy estimated by Lee *et al.* (2014). Red shading indicates *frizzled* gene regions.

**Table S1. Summary of 33 Schneider cell line samples analyzed in this study.** *Drosophila* Genomics Resource Center (DGRC) cell line names are given for all cell line samples except for samples obtained from other sources, which are labeled in the format of “cell line name (source name)”. The “Lab Origin” represents the lab that originally created the sub-line. “Inferred ploidy” and “Inferred sex” represent the ploidy and sex of the cell line, respectively, estimated by Lee *et al.* (2014). “Read pairs” represents the number of paired-end reads for a given cell sub-line sample. “Coverage” represents the average mapped depth of coverage after quality and adaptor trimming. N.A. indicates that this information is not available.

| Cell line                   | DGRC ID  | Lab origin | Inferred ploidy | Inferred sex | SRA         | Read length | Read pairs | Coverage |
|-----------------------------|----------|------------|-----------------|--------------|-------------|-------------|------------|----------|
| mbn2                        | DGRC-147 | Gateff     | 4               | male         | SRR13360020 | 151         | 55531647   | 109.61   |
| mbn2 (Gorski)               | N.A.     | Gateff     | 4               | male         | SRR13360019 | 151         | 63738692   | 126.11   |
| mbn2 (Strand)               | N.A.     | Gateff     | 4               | male         | SRR13360018 | 151         | 68440069   | 132.00   |
| S1                          | DGRC-9   | Cherbas    | 2               | male         | SRR10981795 | 101         | 34904345   | 35.79    |
| S2                          | DGRC-6   | Cherbas    | 4               | male         | SRR10981796 | 101         | 28189507   | 31.67    |
| S2 (ATCC-CRL-1963)          | N.A.     | Others     | 4               | male         | SRR10981814 | 101         | 50088154   | 47.26    |
| S2 (DSMZ-ACC-130-C)         | N.A.     | Others     | 4               | male         | SRR10981794 | 101         | 51683568   | 48.34    |
| S2 (Invitrogen-R69007)      | N.A.     | Others     | 4               | male         | SRR10981793 | 101         | 43038240   | 42.18    |
| S2-act-GFP-alphaTub84B      | DGRC-170 | Rogers     | 4               | male         | SRR10981789 | 101         | 37705915   | 37.57    |
| S2-DRSC-1                   | DGRC-181 | Perrimon   | 4               | male         | SRR10981786 | 101         | 31515040   | 34.76    |
| S2-DRSC-2                   | DGRC-181 | Perrimon   | 4               | male         | SRR10981812 | 101         | 49916928   | 51.87    |
| S2-DRSC-3                   | DGRC-181 | Perrimon   | 4               | male         | SRR10981811 | 101         | 50084326   | 49.18    |
| S2-GFP-SKL                  | DGRC-197 | Rogers     | 4               | male         | SRR10981805 | 101         | 47302631   | 48.96    |
| S2-Mt-Dl                    | DGRC-152 | Klueg      | 4               | male         | SRR10981802 | 101         | 37297961   | 38.88    |
| S2-Mt-EB1-GFP               | DGRC-171 | Rogers     | 4               | male         | SRR10981788 | 101         | 34454428   | 39.07    |
| S2-Mt-Fog-myc               | DGRC-218 | Rogers     | 4               | male         | SRR10981803 | 101         | 38085006   | 40.59    |
| S2-Mt-GFP                   | DGRC-194 | Rogers     | 4               | male         | SRR10981808 | 101         | 41882171   | 43.14    |
| S2-Mt-GFP-Act5C             | DGRC-169 | Rogers     | 4               | male         | SRR10981790 | 101         | 44383445   | 46.85    |
| S2-Mt-mCherry-alphaTub84B   | DGRC-195 | Rogers     | 4               | male         | SRR10981807 | 101         | 44960162   | 44.06    |
| S2-Mt-Msps-GFP              | DGRC-206 | Rogers     | 4               | male         | SRR10981804 | 101         | 47561052   | 48.99    |
| S2-Mt-N                     | DGRC-154 | Klueg      | 4               | male         | SRR10981792 | 101         | 40733228   | 43.91    |
| S2-Mt-Slit                  | DGRC-192 | Rogers     | 4               | male         | SRR10981810 | 101         | 41033908   | 41.86    |
| S2-SQH-GFP                  | DGRC-172 | Rogers     | 4               | male         | SRR10981787 | 101         | 26690953   | 29.73    |
| S2-SQH-GFP+Mt-mCherry-actin | DGRC-193 | Rogers     | 4               | male         | SRR10981809 | 101         | 42525580   | 41.74    |
| S2-Tub-wg                   | DGRC-165 | Nusse      | 4               | male         | SRR10981791 | 101         | 41826501   | 43.40    |
| S2R+                        | DGRC-150 | Wheeler    | 4               | male         | SRR10981813 | 101         | 20056094   | 23.23    |
| S2R+ (DRSC)                 | N.A.     | Perrimon   | 4               | male         | SRR11000336 | 151         | 47640215   | 82.65    |
| S2R+-NPT005                 | DGRC-229 | Perrimon   | 4               | male         | SRR10981801 | 101         | 45413880   | 45.17    |
| S2R+-NPT017                 | DGRC-230 | Perrimon   | 4               | male         | SRR10981800 | 101         | 34459982   | 35.27    |
| S2R+-NPT050                 | DGRC-231 | Perrimon   | 4               | male         | SRR10981799 | 101         | 29162882   | 28.27    |
| S2R+-NPT101                 | DGRC-232 | Perrimon   | 4               | male         | SRR10981798 | 101         | 43114190   | 43.26    |
| S2R+-SQH-GFP                | DGRC-196 | Rogers     | 4               | male         | SRR10981806 | 101         | 49206117   | 47.08    |
| S3                          | DGRC-5   | Cherbas    | 4               | male         | SRR10981797 | 101         | 23764412   | 27.52    |

**Table S2. Number of non-reference TE predictions made by TEMP for 31 Schneider sub-lineage samples.** Numbers of non-reference TE insertion predictions made by TEMP are based on default McClintock (Nelson *et al.*, 2017) settings. *INE-1* and non-reference TE insertion predictions in low recombination regions were excluded. N.A. indicates that this information is not available.

| Cell line                   | DGRC ID  | SRA         | # of TEs |
|-----------------------------|----------|-------------|----------|
| mbn2                        | DGRC-147 | SRR13360020 | 1934     |
| mbn2 (Gorski)               | N.A.     | SRR13360019 | 2195     |
| mbn2 (Strand)               | N.A.     | SRR13360018 | 1980     |
| S1                          | DGRC-9   | SRR10981795 | 743      |
| S2                          | DGRC-6   | SRR10981796 | 1268     |
| S2 (ATCC-CRL-1963)          | N.A.     | SRR10981814 | 847      |
| S2 (DSMZ-ACC-130-C)         | N.A.     | SRR10981794 | 655      |
| S2 (Invitrogen-R69007)      | N.A.     | SRR10981793 | 845      |
| S2-act-GFP-alphaTub84B      | DGRC-170 | SRR10981789 | 975      |
| S2-DRSC-1                   | DGRC-181 | SRR10981786 | 1281     |
| S2-DRSC-2                   | DGRC-181 | SRR10981812 | 1083     |
| S2-DRSC-3                   | DGRC-181 | SRR10981811 | 1057     |
| S2-GFP-SKL                  | DGRC-197 | SRR10981805 | 866      |
| S2-Mt-DI                    | DGRC-152 | SRR10981802 | 1263     |
| S2-Mt-EB1-GFP               | DGRC-171 | SRR10981788 | 1230     |
| S2-Mt-Fog-myc               | DGRC-218 | SRR10981803 | 1293     |
| S2-Mt-GFP                   | DGRC-194 | SRR10981808 | 1323     |
| S2-Mt-GFP-Act5C             | DGRC-169 | SRR10981790 | 804      |
| S2-Mt-mCherry-alphaTub84B   | DGRC-195 | SRR10981807 | 1032     |
| S2-Mt-Msps-GFP              | DGRC-206 | SRR10981804 | 1053     |
| S2-Mt-N                     | DGRC-154 | SRR10981792 | 1134     |
| S2-Mt-Slit                  | DGRC-192 | SRR10981810 | 1038     |
| S2-SQH-GFP                  | DGRC-172 | SRR10981787 | 1533     |
| S2-SQH-GFP+Mt-mCherry-actin | DGRC-193 | SRR10981809 | 994      |
| S2-Tub-wg                   | DGRC-165 | SRR10981791 | 1210     |
| S2R+                        | DGRC-150 | SRR10981813 | 1820     |
| S2R+ (DRSC)                 | N.A.     | SRR11000336 | 2924     |
| S2R+-NPT005                 | DGRC-229 | SRR10981801 | 1435     |
| S2R+-NPT017                 | DGRC-230 | SRR10981800 | 1607     |
| S2R+-NPT050                 | DGRC-231 | SRR10981799 | 1281     |
| S2R+-NPT101                 | DGRC-232 | SRR10981798 | 1494     |
| S2R+-SQH-GFP                | DGRC-196 | SRR10981806 | 1300     |
| S3                          | DGRC-5   | SRR10981797 | 1204     |

## Supplemental References

- Boeva, V., T. Popova, K. Bleakley, P. Chiche, J. Cappel, *et al.*, 2012 Control-FREEC: a tool for assessing copy number and allelic content using next-generation sequencing data. *Bioinformatics* **28**: 423–425.
- Lee, H., C. J. McManus, D.-Y. Cho, M. Eaton, F. Renda, *et al.*, 2014 DNA copy number evolution in *Drosophila* cell lines. *Genome Biol* **15**: R70.
- Nelson, M. G., R. S. Linheiro, and C. M. Bergman, 2017 McClintock: an integrated pipeline for detecting transposable element insertions in whole-genome shotgun sequencing data. *G3* **7**: 2749–2762.
- Zhuang, J., J. Wang, W. Theurkauf, and Z. Weng, 2014 TEMP: a computational method for analyzing transposable element polymorphism in populations. *Nucleic Acids Res* **42**: 6826–6838.
